# Supplementary material for: Extended chain conformation of β-glucan and its effect on antitumor activity
Source: Royal Society of Chemistry journal article supplement (doi:10.1039/c7tb01324h), 2017-01-01
Supplement: c7tb01324h1.pdf [file c7tb01324h1.pdf]

Electronic Supplementary Material (ESI) for Journal of Materials Chemistry B.

This journal is The Royal Society of Chemistry 2017

1

## **Supporting Information**

2

### **3 Extended Chain Conformation of $\beta$ -Glucan and Its 4 Effect on Antitumor Activity**

5

Xing Zheng, Fengzhi Lu, Xiaojuan Xu\*, Lina Zhang\*

6

College of Chemistry and Molecular Sciences, Wuhan University, Wuhan 430072,

7

China

8

\* Corresponding authore-mail address: zhangln@whu.edu.cn; xuxj@whu.edu.cn

## 9 Contents

|    |    |                                                                                  |    |
|----|----|----------------------------------------------------------------------------------|----|
| 10 | 1. | Isolation of THG from <i>Lentinus edodes</i> . (Fig. S1).....                    | S3 |
| 11 | 2. | The ultrasonic time dependence of $M_w$ for THG fractions. (Fig. S2) .....       | S4 |
| 12 | 3. | Zimm plots of THG2 and THG4. (Fig.S3).....                                       | S5 |
| 13 | 4. | AFM images of THG2, THG4, and THG6. (Fig.S4).....                                | S6 |
| 14 | 5. | The apparent hydrodynamic radius distributions ( $f(R_h)$ ) of THG in water with |    |
| 15 |    | different concentrations at 25 °C. (Fig.S5).....                                 | S7 |
| 16 | 6. | The spleen index of tumor-bearing mice after 20 days treatment. (Fig.S6) .....   | S8 |
| 17 | 7. | Effects of THG on apoptosis-associated protein level. (Fig.S7) .....             | S9 |

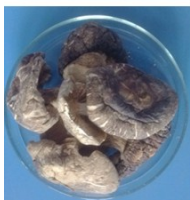

**Fruiting Body of *Lentinus edodes***

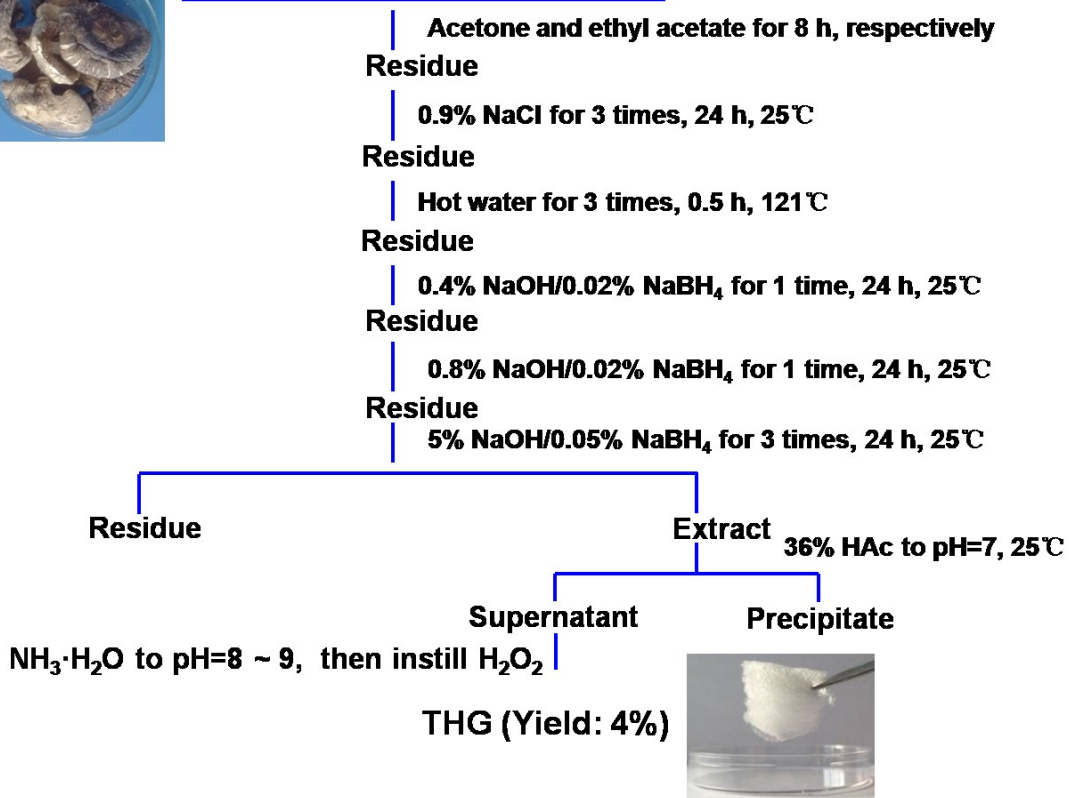

19

20 Fig. S1 Isolation of THG from *Lentinus edodes*.

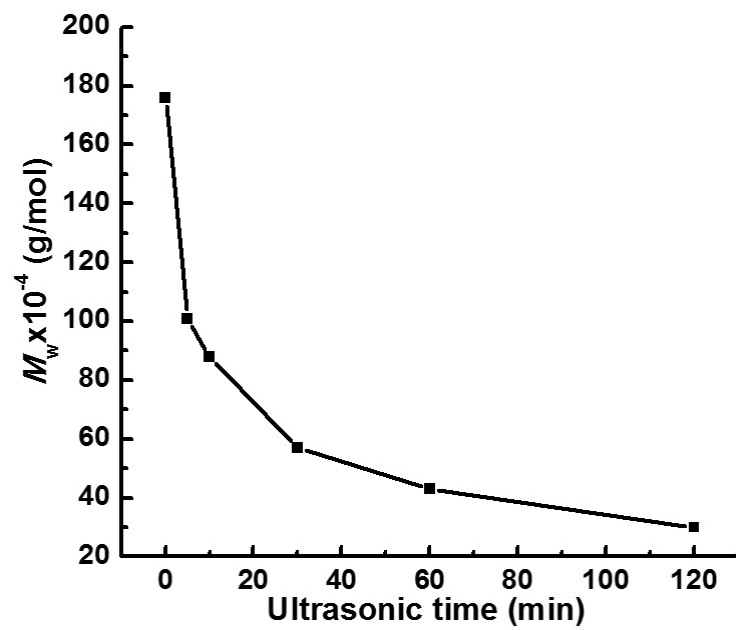

22

23 **Fig. S2** The ultrasonic time dependence of  $M_w$  for THG fractions in water.

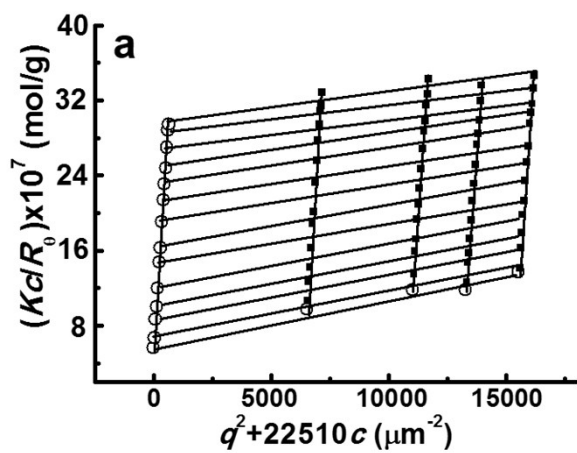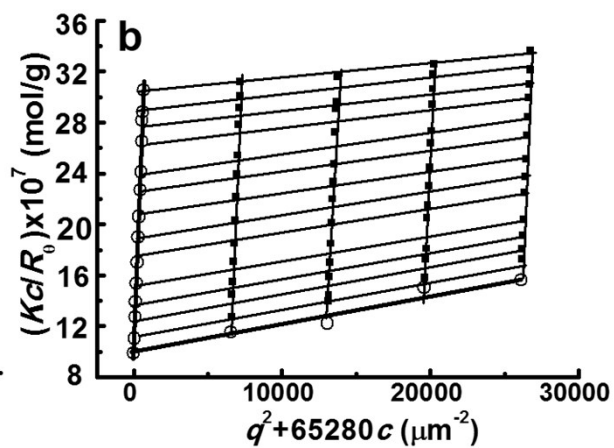

25

26 Fig. S3 Zimm Plots of THG2 (a) and THG4 (b).

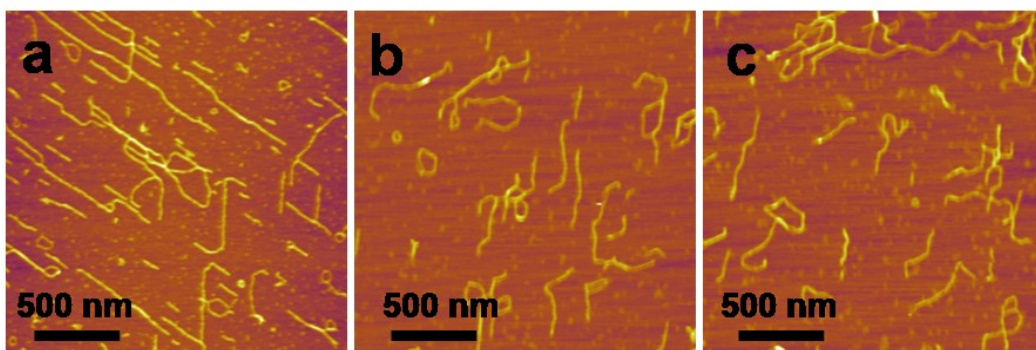

28

29 **Fig. S4** AFM images of THG2 (a), THG4 (b), THG6 (c) in water with a concentration of 2  $\mu\text{g/mL}$ .

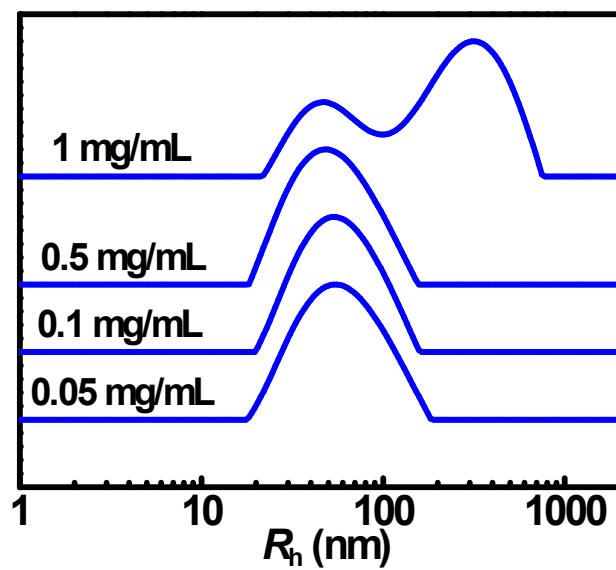

31

32 **Fig. S5** The apparent hydrodynamic radius distributions ( $f(R_h)$ ) of THG in water with different  
33 concentrations at 25 °C (scattering angle  $\theta=60^\circ$ ).

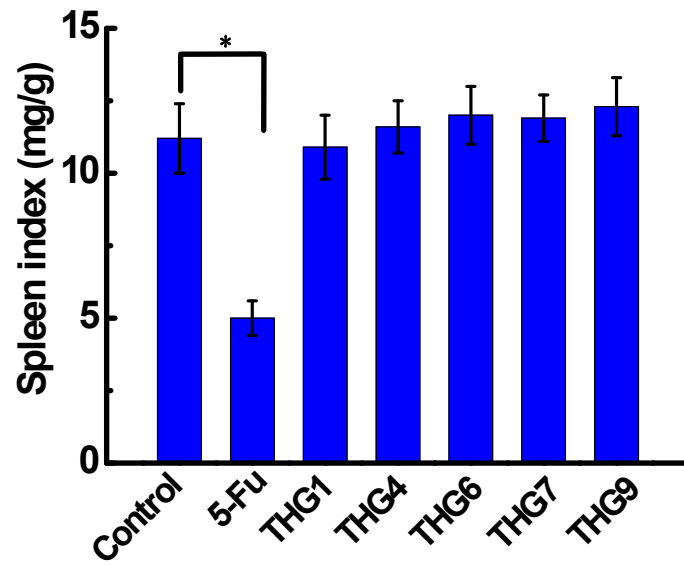

34

35 **Fig. S6** The spleen index of tumor-bearing mice after 20 days treatment with THG fractions (5  
36 mg/kg per day). The bars represent the S.E., \*p < 0.05.



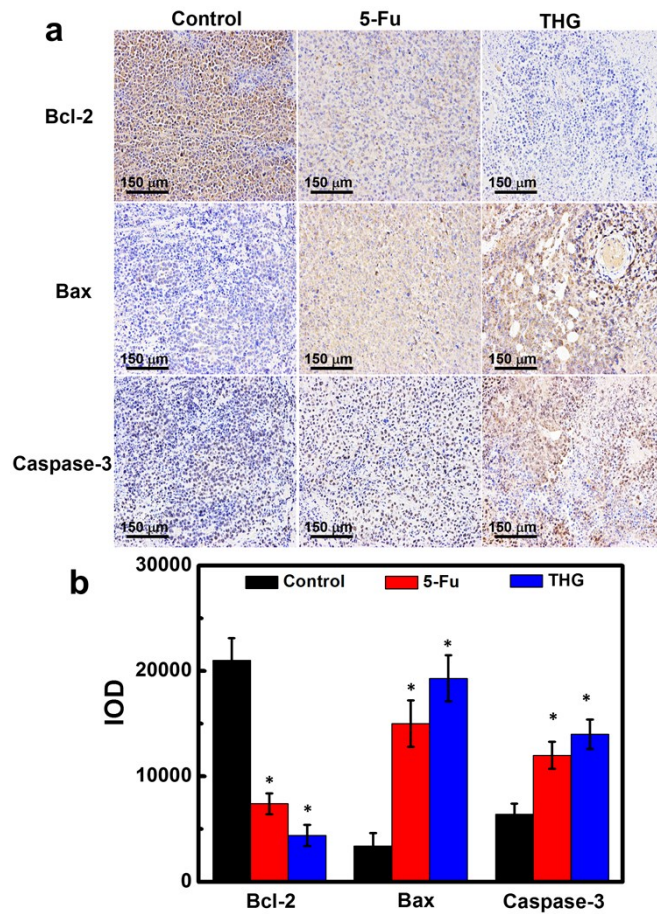

38

39 **Fig. S7** Effects of THG on apoptosis-associated protein level in H22 tumor tissues. (a)  
 40 Immunohistochemistry of tumor tissue, stained with antibody against Bcl-2, Bax and caspase-3  
 41 (brown). (b) Quantification (IOD) of Bcl-2, Bax and caspase-3 per 100 mm<sup>2</sup> of (a), The bars  
 42 represent the S.E., \* p < 0.05 v.s. control.
